# Supplementary material
Source: ML conference proceedings conference paper supplement (https://proceedings.neurips.cc/paper_files/paper/2016/hash/ee26fc66b1369c7625333bedafbfcaf6-Abstract.html)
Supplement: Supplementary file [file ee26fc66b1369c7625333bedafbfcaf6-Supplemental.zip]

## Abstract

This supplementary document contains all the technical proofs and several additional remarks for the NIPS'16 paper entitled "Learning Additive Exponential Family Graphical Models via  $\ell_{2,1}$ -norm Regularized M-Estimation". It is indeed the appendix section of the paper. The technical proofs are provided in Appendix A. The additional remarks on key assumptions are presented in Appendix B.

## A Technical Proofs

### A.1 Proof of Proposition 1

*Proof.* Since  $\mathbb{P}(Y) > 0$ , it is standard to know (see, e.g., [14]) that an approximate 0.99 confidence interval for  $\exp\{A(\hat{\theta}_n)\}$  is  $\exp\{\hat{A}(\hat{\theta}_n; \mathbb{Y}_m)\} \pm 2.58\hat{\sigma}_n/\sqrt{m}$  with  $\hat{\sigma}$  given in the proposition. From the convexity of logarithm function we have the following inequality holds with confidence approximately 0.99:

$$\begin{aligned}\hat{A}(\hat{\theta}_n; \mathbb{Y}_m) &= \log\left(\exp\{\hat{A}(\hat{\theta}_n; \mathbb{Y}_m)\}\right) \\ &\leq \log\left(\exp\{A(\hat{\theta}_n)\}\right) + \frac{2.58\hat{\sigma} \exp\{-\hat{A}(\hat{\theta}_n; \mathbb{Y}_m)\}}{\sqrt{m}} \\ &= A(\hat{\theta}_n) + \frac{2.58\hat{\sigma} \exp\{-\hat{A}(\hat{\theta}_n; \mathbb{Y}_m)\}}{\sqrt{m}}.\end{aligned}$$

Similarly, for  $\hat{\hat{\theta}}_n$ , we have the following inequality holds with confidence approximately 0.99:

$$A(\hat{\hat{\theta}}_n) \leq \hat{A}(\hat{\hat{\theta}}_n; \mathbb{Y}_m) + \frac{2.58\hat{\sigma} \exp\{-A(\hat{\hat{\theta}}_n)\}}{\sqrt{m}},$$

From the preceding two inequalities and the optimality of  $\hat{\hat{\theta}}_n$  we have that

$$\begin{aligned}L(\hat{\hat{\theta}}_n; \mathbb{X}_n) + \lambda_n \|\hat{\hat{\theta}}_n\|_{2,1} &\leq \hat{L}(\hat{\hat{\theta}}_n; \mathbb{X}_n, \mathbb{Y}_m) + \lambda_n \|\hat{\hat{\theta}}_n\|_{2,1} + \frac{2.58\hat{\sigma} \exp\{-A(\hat{\hat{\theta}}_n)\}}{\sqrt{m}} \\ &\leq \hat{L}(\hat{\hat{\theta}}_n; \mathbb{X}_n, \mathbb{Y}_m) + \lambda_n \|\hat{\hat{\theta}}_n\|_{2,1} + \frac{2.58\hat{\sigma} \exp\{-A(\hat{\hat{\theta}}_n)\}}{\sqrt{m}} \\ &\leq L(\hat{\hat{\theta}}_n; \mathbb{X}_n) + \lambda_n \|\hat{\hat{\theta}}_n\|_{2,1} + \frac{2.58\hat{\sigma} \left(\exp\{-A(\hat{\hat{\theta}}_n)\} + \exp\{-\hat{A}(\hat{\hat{\theta}}_n; \mathbb{Y}_m)\}\right)}{\sqrt{m}}\end{aligned}$$

holds with high probability.  $\square$

### A.2 Proof of Theorem 1

We need the following result which indicates that under Assumption 1,  $\{Z_{s,k}, Z_{st,l}\}$  satisfy a large deviation inequality.

**Lemma 1.** *If Assumption 1 holds, then for all  $(s, k)$  and  $(s, t, l)$  and any  $\varepsilon \leq \zeta\sigma^2$  we have*

$$\begin{aligned}\mathbb{P}\left(\left|\frac{1}{n} \sum_{i=1}^n \varphi_k(X_s^{(i)}) - \mathbb{E}_{\theta^*}[\varphi_k(X_s)]\right| > \varepsilon\right) &\leq 2 \exp\left\{-\frac{n\varepsilon^2}{2\sigma^2}\right\}, \\ \mathbb{P}\left(\left|\frac{1}{n} \sum_{i=1}^n \phi_l(X_s^{(i)}, X_t^{(i)}) - \mathbb{E}_{\theta^*}[\phi_l(X_s, X_t)]\right| > \varepsilon\right) &\leq 2 \exp\left\{-\frac{n\varepsilon^2}{2\sigma^2}\right\}.\end{aligned}$$

*Proof.* From the definition and the “law of the unconscious statistician” we know that Assumption 1 identically requires

$$\mathbb{E}_{\theta^*}[\exp\{\eta(Z_{s,k})\}] \leq \exp\{\sigma^2\eta^2/2\}, \quad \mathbb{E}_{\theta^*}[\exp\{\eta(Z_{st,l})\}] \leq \exp\{\sigma^2\eta^2/2\}.$$

Since  $X^{(i)}$  are i.i.d. samples of  $X$ , we have that  $Z_{s,k}^{(i)} = \varphi_k(X_s^{(i)}) - \mathbb{E}_{\theta^*}[\varphi_k(X_s)]$  are also i.i.d. samples of  $Z_{s,k}$ . We use the exponential Markov inequality for the sum  $Z = \sum_{i=1}^n Z_{s,k}^{(i)}$  and with a parameter  $\eta > 0$ :

$$\mathbb{P}(Z > \epsilon) = \mathbb{P}(\exp\{\eta Z\} > \exp\{\eta\epsilon\}) \leq \frac{\mathbb{E}[\exp\{\eta Z\}]}{\exp\{\eta\epsilon\}} = \frac{\prod_{i=1}^n \mathbb{E}[\exp\{\eta Z_{st}^{(i)}\}]}{\exp\{\eta\epsilon\}}.$$

If  $\eta \leq \zeta$ , Assumption 1 yields

$$\mathbb{P}(Z > n\epsilon) \leq \frac{\exp\{n\sigma^2\eta^2/2\}}{\exp\{\eta n\epsilon\}} = \exp\{-\eta n\epsilon + n\sigma^2\eta^2/2\},$$

whose minimum is attained at  $\eta = \min(\frac{\epsilon}{\sigma^2}, \zeta)$ . Thus, for any  $\epsilon \leq \sigma^2\zeta$ , we have

$$\mathbb{P}(Z > n\epsilon) \leq \exp\left\{-\frac{n\epsilon^2}{2\sigma^2}\right\}.$$

Repeating this argument for  $-Z_{st}^{(i)}$  instead of  $Z_{st}^{(i)}$ , we obtain the same bound for  $\mathbb{P}(-Z > n\epsilon)$ . Combining these two bounds yields

$$\mathbb{P}\left(\left|\frac{1}{n} \sum_{i=1}^n \phi(X_s^{(i)}, X_t^{(i)}) - \mathbb{E}_{\theta^*}[\phi(X_s, X_t)]\right| > \epsilon\right) = \mathbb{P}(|Z| > n\epsilon) \leq 2 \exp\left\{-\frac{n\epsilon^2}{2\sigma^2}\right\}.$$

The second inequality can be similarly proved. This completes the proof.  $\square$

Let us define  $\gamma_n := \|\nabla L(\theta^*; \mathbb{X}_n)\|_{2,\infty}$ . The following lemma indicates that under Assumption 1, with overwhelming probability,  $\gamma_n$  approaches zero at the rate of  $O(\sqrt{\max\{q, r\} \ln p/n})$ .

**Lemma 2.** Assume that Assumption 1 is valid. If  $n > 6 \max\{q, r\} \ln p/(\sigma^2\zeta^2)$ , then with probability at least  $1 - 2 \max\{q, r\} p^{-1}$  the following inequality holds:

$$\gamma_n = \|\nabla L(\theta^*; \mathbb{X}_n)\|_{2,\infty} \leq \sigma \sqrt{6 \max\{q, r\} \ln p/n}.$$

*Proof.* From the gradient term (6) and Lemma 1 we have the following inequalities hold for any  $\epsilon < \sigma^2\zeta$ :

$$\begin{aligned} \mathbb{P}\left(\left|\frac{\partial L(\theta^*; \mathbb{X}_n)}{\partial \theta_{s,k}^*}\right| > \epsilon\right) &= \mathbb{P}\left(\left|\frac{1}{n} \sum_{i=1}^n \varphi_k(X_s^{(i)}) - \mathbb{E}_{\theta^*}[\varphi_k(X_s)]\right| > \epsilon\right) \leq 2 \exp\left\{-\frac{n\epsilon^2}{2\sigma^2}\right\}, \\ \mathbb{P}\left(\left|\frac{\partial L(\theta^*; \mathbb{X}_n)}{\partial \theta_{st,l}^*}\right| > \epsilon\right) &= \mathbb{P}\left(\left|\frac{1}{n} \sum_{i=1}^n \phi_l(X_s^{(i)}, X_t^{(i)}) - \mathbb{E}_{\theta^*}[\phi_l(X_s, X_t)]\right| > \epsilon\right) \leq 2 \exp\left\{-\frac{n\epsilon^2}{2\sigma^2}\right\}. \end{aligned}$$

Let  $\theta_s^* = [\theta_{s,1}^*, \dots, \theta_{s,q}^*]$  and  $\theta_{st}^* = [\theta_{st,1}^*, \dots, \theta_{st,r}^*]$ . By the union bound we obtain

$$\begin{aligned} \mathbb{P}\left(\left\|\frac{\partial L(\theta^*; \mathbb{X}_n)}{\partial \theta_s^*}\right\| > \epsilon\right) &\leq \sum_{k=1}^q \mathbb{P}\left(\left|\frac{\partial L(\theta^*; \mathbb{X}_n)}{\partial \theta_{s,k}^*}\right| > \frac{\epsilon}{\sqrt{q}}\right) \leq 2q \exp\left\{-\frac{n\epsilon^2}{2q\sigma^2}\right\}, \\ \mathbb{P}\left(\left\|\frac{\partial L(\theta^*; \mathbb{X}_n)}{\partial \theta_{st}^*}\right\| > \epsilon\right) &\leq \sum_{l=1}^r \mathbb{P}\left(\left|\frac{\partial L(\theta^*; \mathbb{X}_n)}{\partial \theta_{st,l}^*}\right| > \frac{\epsilon}{\sqrt{r}}\right) \leq 2r \exp\left\{-\frac{n\epsilon^2}{2r\sigma^2}\right\}. \end{aligned}$$

Therefore,

$$\begin{aligned} \mathbb{P}(\|\nabla L(\theta^*; \mathbb{X}_n)\|_{2,\infty} > \epsilon) &\leq 2qp \exp\left\{-\frac{n\epsilon^2}{2q\sigma^2}\right\} + 2r(p^2 - p) \exp\left\{-\frac{n\epsilon^2}{2r\sigma^2}\right\} \\ &\leq 2 \max\{q, r\} p^2 \exp\left\{-\frac{n\epsilon^2}{2 \max\{q, r\} \sigma^2}\right\}. \end{aligned}$$

Let us choose  $\varepsilon = \sigma \sqrt{6 \max\{q, r\} \ln p/n}$ . Since  $n > 6 \max\{q, r\} \ln p/(\sigma^2 \zeta^2)$ , we have  $\varepsilon < \sigma^2 \zeta$ . Therefore we obtain that with probability at least  $1 - 2 \max\{q, r\} p^{-1}$ ,

$$\|\nabla L(\theta^*; \mathbb{X}_n)\|_{2,\infty} \leq \sigma \sqrt{6 \max\{q, r\} \ln p/n}.$$

This completes the proof of Lemma 2.  $\square$

The following result further bounds the estimation error of the MLE estimator (7) in terms of  $\gamma_n$ ,  $\delta$  and  $\beta$ .

**Lemma 3.** *Assume that the conditions in Assumption 2 hold true. Assume that  $\lambda_n \in [2\gamma_n, c_0\gamma_n]$  for some  $c_0 \geq 2$ . Define  $\gamma = 3c_0\sqrt{\|\theta^*\|_{2,0}\beta^{-1}\gamma_n}$ . If  $\gamma < \delta$ , then we have*

$$\|\hat{\theta}_n - \theta^*\| \leq 3c_0\sqrt{\|\theta^*\|_{2,0}\beta^{-1}\gamma_n}.$$

*Proof.* Let  $\Delta\theta = \hat{\theta}_n - \theta^*$  and we define  $\Delta\tilde{\theta} = t\Delta\theta$  where we pick  $t = 1$  if  $\|\Delta\theta\| \leq \delta$  and  $t \in (0, 1)$  with  $\|\Delta\tilde{\theta}\| = \delta$  otherwise. By construction we have  $\|\Delta\tilde{\theta}\| \leq r$ . We now claim that  $\|\Delta\tilde{\theta}_{\bar{S}}\|_{2,1} \leq 3\|\Delta\tilde{\theta}_S\|_{2,1}$ . Indeed, since  $\theta_{\bar{S}}^* = 0$ , we have

$$\|\theta^* + \Delta\tilde{\theta}\|_{2,1} - \|\theta^*\|_{2,1} = \|(\theta^* + \Delta\tilde{\theta})_S\|_{2,1} + \|\Delta\tilde{\theta}_{\bar{S}}\|_{2,1} - \|\theta_S^*\|_{2,1} \geq \|\Delta\tilde{\theta}_{\bar{S}}\|_{2,1} - \|\Delta\tilde{\theta}_S\|_{2,1}. \quad (\text{A.1})$$

From the convexity of function  $L(\theta; \mathbb{X}_n)$  and  $\lambda_n \geq 2\gamma_n = 2\|\nabla L(\theta^*; \mathbb{X}_n)\|_{2,\infty}$  we have

$$L(\theta^* + \Delta\tilde{\theta}; \mathbb{X}_n) - L(\theta^*; \mathbb{X}_n) \geq \langle \nabla L(\theta^*; \mathbb{X}_n), \Delta\tilde{\theta} \rangle \geq -\|\nabla L(\theta^*; \mathbb{X}_n)\|_{2,\infty} \|\Delta\tilde{\theta}\|_{2,1} \geq -\frac{\lambda_n}{2} \|\Delta\tilde{\theta}\|_{2,1}. \quad (\text{A.2})$$

Due to the optimality of  $\hat{\theta}_n$  and the convexity of  $L(\theta; \mathbb{X}_n)$ , it holds that

$$L(\theta^* + \Delta\tilde{\theta}; \mathbb{X}_n) + \lambda_n \|\theta^* + \Delta\tilde{\theta}\|_{2,1} \leq L(\theta^*; \mathbb{X}_n) + \lambda_n \|\theta^*\|_{2,1}. \quad (\text{A.3})$$

By combining the proceeding three inequalities (A.1), (A.2) and (A.3), we obtain that

$$\begin{aligned} 0 &\geq L(\theta^* + \Delta\tilde{\theta}; \mathbb{X}_n) + \lambda_n \|\theta^* + \Delta\tilde{\theta}\|_{2,1} - L(\theta^*; \mathbb{X}_n) - \lambda_n \|\theta^*\|_{2,1} \\ &\geq -\frac{\lambda_n}{2} (\|\Delta\tilde{\theta}_S\|_{2,1} + \|\Delta\tilde{\theta}_{\bar{S}}\|_{2,1}) + \lambda_n (\|\Delta\tilde{\theta}_{\bar{S}}\|_{2,1} - \|\Delta\tilde{\theta}_S\|_{2,1}), \end{aligned}$$

which implies  $\|\Delta\tilde{\theta}_{\bar{S}}\|_{2,1} \leq 3\|\Delta\tilde{\theta}_S\|_{2,1}$ . From second-order Taylor expansion we know that there exists a real number  $\xi \in [0, 1]$  such that

$$L(\theta^* + \Delta\tilde{\theta}; \mathbb{X}_n) = L(\theta^*; \mathbb{X}_n) + \langle \nabla L(\theta^*; \mathbb{X}_n), \Delta\tilde{\theta} \rangle + \frac{1}{2} \tilde{\Delta}\theta^\top \nabla^2 L(\theta^* + \xi\Delta\tilde{\theta}; \mathbb{X}_n) \tilde{\Delta}\theta.$$

By using Assumption 2 (note that  $\|\xi\tilde{\Delta}\theta\| \leq \|\tilde{\Delta}\theta\| \leq r$ ) and (A.2) we have

$$L(\theta^* + \Delta\tilde{\theta}; \mathbb{X}_n) - L(\theta^*; \mathbb{X}_n) \geq \langle \nabla L(\theta^*; \mathbb{X}_n), \Delta\tilde{\theta} \rangle + \frac{\beta}{2} \|\tilde{\Delta}\theta\|^2 \geq -\frac{\lambda_n}{2} \|\Delta\tilde{\theta}\|_{2,1} + \frac{\beta}{2} \|\tilde{\Delta}\theta\|^2. \quad (\text{A.4})$$

By combining the inequalities (A.1), (A.3) and (A.4), we obtain

$$\begin{aligned} 0 &\geq L(\theta^* + \Delta\tilde{\theta}; \mathbb{X}_n) + \lambda_n \|\theta^* + \Delta\tilde{\theta}\|_{2,1} - L(\theta^*; \mathbb{X}_n) - \lambda_n \|\theta^*\|_{2,1} \\ &\geq -\frac{\lambda_n}{2} \|\Delta\tilde{\theta}\|_{2,1} + \frac{\beta}{2} \|\tilde{\Delta}\theta\|^2 + \lambda_n (\|\tilde{\Delta}\theta_{\bar{S}}\|_{2,1} - \|\tilde{\Delta}\theta_S\|_{2,1}) \\ &\geq \frac{\lambda_n}{2} (\|\Delta\tilde{\theta}_{\bar{S}}\|_{2,1} - 3\|\Delta\tilde{\theta}_S\|_{2,1}) + \frac{\beta}{2} \|\Delta\tilde{\theta}\|^2 \\ &\geq -1.5\lambda_n \|\Delta\tilde{\theta}_S\|_{2,1} + \frac{\beta}{2} \|\Delta\tilde{\theta}\|^2 \geq -1.5\lambda_n \sqrt{\|\theta^*\|_{2,0}} \|\Delta\tilde{\theta}\| + \frac{\beta}{2} \|\Delta\tilde{\theta}\|^2, \end{aligned}$$

which implies that

$$\|\Delta\tilde{\theta}\| \leq 3\lambda_n \beta^{-1} \sqrt{\|\theta^*\|_{2,0}} \leq 3c_0 \sqrt{\|\theta^*\|_{2,0} \beta^{-1} \gamma_n} = \gamma.$$

Since  $\gamma < \delta$ , we claim that  $t = 1$  and thus  $\Delta\tilde{\theta} = \Delta\theta$ . Indeed, if otherwise  $t < 1$ , then  $\|\Delta\tilde{\theta}\| = \delta > \gamma$  which contradicts the above inequality. This completes the proof.  $\square$

Equipped with Lemma 2 and Lemma 3, we are now in the position to prove Theorem 1.

*Proof of Theorem 1.* By invoking Lemma 2 and the condition  $n > 54c_0^2\delta^{-2}\beta^{-2}\sigma^2\|\theta^*\|_{2,0}\ln p$  we have that with probability at least  $1 - 2\max\{q, r\}p^{-1}$ ,

$$\gamma = 3c_0\sqrt{|E|}\beta^{-1}\gamma_n \leq 3c_0\beta^{-1}\sigma\sqrt{6\max\{q, r\}\|\theta^*\|_{2,0}\ln p/n} < \delta.$$

By applying Lemma 3 we obtain the desired result.  $\square$

### A.3 Proof of Theorem 2

To prove the theorem, we will need to study the concentration bound of the random variables defined by

$$\tilde{Z}_{s,k} := \mathbb{E}_{\theta_s^*}[\varphi_k(X_s) | X_{\setminus s}] - \mathbb{E}_{\theta^*}[\varphi_k(X_s)], \quad \tilde{Z}_{st,l} := \mathbb{E}_{\theta_s^*}[\phi_l(X_s, X_t) | X_{\setminus s}] - \mathbb{E}_{\theta^*}[\phi_l(X_s, X_t)].$$

The following lemma shows that under Assumption 1,  $\tilde{Z}_{st}$  have exponential-type moment generating function.

**Lemma 4.** *If Assumption 1 holds, then we have that for any  $(s, k)$ ,  $(s, t, l)$ , and for all  $|\eta| \leq \zeta$ ,*

$$\mathbb{E}[\exp\{\eta\tilde{Z}_{s,k}\}] \leq \exp\{\sigma^2\eta^2/2\}, \quad \mathbb{E}[\exp\{\eta\tilde{Z}_{st,l}\}] \leq \exp\{\sigma^2\eta^2/2\}.$$

*Proof.* We only prove the first inequality as the second one can be very similarly proved. Note that for any  $\eta$ ,  $\exp\{\eta x\}$  is convex with respect to  $x$ . By applying Jensen's inequality we have

$$\exp\{\eta\mathbb{E}_{\theta_s^*}[\varphi_k(X_s) | X_{\setminus s}]\} \leq \mathbb{E}_{\theta_s^*}[\exp\{\eta\varphi_k(X_s)\} | X_{\setminus s}].$$

By taking the expectation  $\mathbb{E}_{\theta_s^*}[\cdot]$  with respect to the marginal distribution of  $X_{\setminus s}$ , and using the rule of iterated expectation, we obtain

$$\mathbb{E}_{\theta_s^*}[\exp\{\eta\mathbb{E}_{\theta_s^*}[\varphi_k(X_s) | X_{\setminus s}]\}] \leq \mathbb{E}_{\theta_s^*}[\mathbb{E}_{\theta_s^*}[\exp\{\eta\varphi_k(X_s)\} | X_{\setminus s}]] = \mathbb{E}_{\theta^*}[\exp\{\eta\varphi_k(X_s)\}].$$

By using the ‘‘law of the unconscious statistician’’ and the above inequality we obtain

$$\mathbb{E}[\exp\{\eta\tilde{Z}_{s,k}\}] \leq \mathbb{E}[\exp\{\eta Z_{s,k}\}] \leq \exp\{\sigma^2\eta^2/2\},$$

where the last inequality follows from Assumption 1. This completes the proof.  $\square$

This lemma shows that the random variables  $\{\tilde{Z}_{s,k}, \tilde{Z}_{st,l}\}$  all have the same exponential-type moment generating function as that of  $\{Z_{s,k}, Z_{st,l}\}$  investigated in the previous subsection.

Based on Lemma 4 and the proof of Lemma 1, we may establish the following lemma which will be used in the proofs to follow.

**Lemma 5.** *If Assumption 1 holds, then for all  $(s, t)$ ,  $(s, t, l)$  and any  $\varepsilon \leq \sigma^2\zeta$  we have*

$$\begin{aligned} \mathbb{P}\left(\left|\frac{1}{n}\sum_{i=1}^n \mathbb{E}_{\theta_s^*}[\varphi_k(X_s) | X_{\setminus s}^{(i)}] - \mathbb{E}_{\theta^*}[\varphi_k(X_s)]\right| > \varepsilon\right) &\leq 2\exp\left\{-\frac{n\varepsilon^2}{2\sigma^2}\right\}, \\ \mathbb{P}\left(\left|\frac{1}{n}\sum_{i=1}^n \mathbb{E}_{\theta_s^*}[\phi_l(X_s, X_t) | X_{\setminus s}^{(i)}] - \mathbb{E}_{\theta^*}[\phi_l(X_s, X_t)]\right| > \varepsilon\right) &\leq 2\exp\left\{-\frac{n\varepsilon^2}{2\sigma^2}\right\}. \end{aligned}$$

Let us define  $\tilde{\gamma}_n := \|\nabla \tilde{L}(\theta_s^*; \mathbb{X}_n)\|_{2,\infty}$ . The following lemma further indicates that under Assumption 1, with overwhelming probability,  $\tilde{\gamma}_n$  approaches zero at the rate of  $O(\sqrt{\max\{q, r\}\ln p/n})$ .

**Lemma 6.** *Assume that Assumption 1 holds. If  $n > 6\max\{q, r\}\ln p/(\sigma^2\zeta^2)$ , then with probability at least  $1 - 4\max\{q, r\}p^{-2}$  the following inequality holds:*

$$\tilde{\gamma}_n \leq 2\sigma\sqrt{6\max\{q, r\}\ln p/n}.$$

*Proof.* Recall the formulation of gradient  $\nabla \tilde{L}(\theta_s; \mathbb{X}_n)$  in (9). For any node  $t \in V \setminus s$ , we have

$$\begin{aligned} & \left| \frac{\partial \tilde{L}(\theta_s^*; \mathbb{X}_n)}{\partial \theta_{st,l}^*} \right| \\ &= \left| \frac{1}{n} \sum_{i=1}^n -\phi_l(X_s^{(i)}, X_t^{(i)}) + \mathbb{E}_{\theta_s^*}[\phi_l(X_s, X_t^{(i)}) \mid X_{\setminus s}^{(i)}] \right| \\ &\leq \left| \frac{1}{n} \sum_{i=1}^n \phi_l(X_s^{(i)}, X_t^{(i)}) - \mathbb{E}_{\theta_s^*}[\phi_l(X_s, X_t)] \right| + \left| \frac{1}{n} \sum_{i=1}^n \mathbb{E}_{\theta_s^*}[\phi_l(X_s, X_t^{(i)}) \mid X_{\setminus s}^{(i)}] - \mathbb{E}_{\theta_s^*}[\phi_l(X_s, X_t)] \right|. \end{aligned}$$

Therefore, for any  $\varepsilon \leq 2\sigma^2\zeta$ ,

$$\begin{aligned} \mathbb{P} \left( \left| \frac{\partial \tilde{L}(\theta_s^*; \mathbb{X}_n)}{\partial \theta_{st,l}^*} \right| > \varepsilon \right) &\leq \mathbb{P} \left( \left| \frac{1}{n} \sum_{i=1}^n \phi_l(X_s^{(i)}, X_t^{(i)}) - \mathbb{E}_{\theta_s^*}[\phi_l(X_s, X_t)] \right| > \frac{\varepsilon}{2} \right) \\ &\quad + \mathbb{P} \left( \left| \frac{1}{n} \sum_{i=1}^n \mathbb{E}_{\theta_s^*}[\phi_l(X_s, X_t^{(i)}) \mid X_{\setminus s}^{(i)}] - \mathbb{E}_{\theta_s^*}[\phi_l(X_s, X_t)] \right| > \frac{\varepsilon}{2} \right) \\ &\stackrel{\xi_1}{\leq} 4 \exp \left\{ -\frac{n\varepsilon^2}{8\sigma^2} \right\}, \end{aligned}$$

where  $\xi_1$  follows from Lemma 1 and Lemma 5. Similarly, we can show

$$\mathbb{P} \left( \left| \frac{\partial \tilde{L}(\theta_s^*; \mathbb{X}_n)}{\partial \theta_{s,k}^*} \right| > \varepsilon \right) \leq 4 \exp \left\{ -\frac{n\varepsilon^2}{8\sigma^2} \right\}.$$

By the union bound we obtain

$$\begin{aligned} \mathbb{P} \left( \left\| \frac{\partial \tilde{L}(\theta_s^*; \mathbb{X}_n)}{\partial \theta_s^*} \right\| > \varepsilon \right) &\leq \sum_{k=1}^q \mathbb{P} \left( \left| \frac{\partial \tilde{L}(\theta_s^*; \mathbb{X}_n)}{\partial \theta_{s,k}^*} \right| > \frac{\varepsilon}{\sqrt{q}} \right) \leq 4q \exp \left\{ -\frac{n\varepsilon^2}{8q\sigma^2} \right\}, \\ \mathbb{P} \left( \left\| \frac{\partial \tilde{L}(\theta_s^*; \mathbb{X}_n)}{\partial \theta_{st}^*} \right\| > \varepsilon \right) &\leq \sum_{l=1}^r \mathbb{P} \left( \left| \frac{\partial \tilde{L}(\theta_s^*; \mathbb{X}_n)}{\partial \theta_{st,l}^*} \right| > \frac{\varepsilon}{\sqrt{r}} \right) \leq 4r \exp \left\{ -\frac{n\varepsilon^2}{8r\sigma^2} \right\}. \end{aligned}$$

This implies

$$\mathbb{P}(\|\nabla \tilde{L}(\theta_s^*; \mathbb{X}_n)\|_{2,\infty} > \varepsilon) \leq 4q \exp \left\{ -\frac{n\varepsilon^2}{8q\sigma^2} \right\} + 4r(p-1) \exp \left\{ -\frac{n\varepsilon^2}{8r\sigma^2} \right\} \leq 4 \max\{q, r\} p \exp \left\{ -\frac{n\varepsilon^2}{8 \max\{q, r\} \sigma^2} \right\}.$$

Let us choose  $\varepsilon = 2\sigma\sqrt{6 \max\{q, r\} \ln p/n}$ . Since  $n > 6 \max\{q, r\} \ln p/(\sigma^2\zeta^2)$ , we have  $\varepsilon < 2\sigma^2\zeta$ . We conclude that with probability at least  $1 - 4 \max\{q, r\} p^{-2}$ ,

$$\|\nabla \tilde{L}(\theta_s^*; \mathbb{X}_n)\|_{2,\infty} \leq 2\sigma\sqrt{6 \max\{q, r\} \ln p/n}.$$

This proves the desired bound.  $\square$

The following result establishes the estimation error of the node-conditional estimator (10) in terms of  $\tilde{\gamma}_n$ ,  $\tilde{\delta}$  and  $\tilde{\beta}$ .

**Lemma 7.** Assume that the conditions in Assumption 3 hold. Assume that  $\lambda_n \in [2\tilde{\gamma}_n, \tilde{c}_0\tilde{\gamma}_n]$  for some  $\tilde{c}_0 \geq 2$ . Define  $\tilde{\gamma} = 3\tilde{c}_0\sqrt{\max\{q, r\}(d+1)\tilde{\beta}^{-1}\tilde{\gamma}_n}$ . If  $\tilde{\gamma} < \tilde{\delta}$ , then we have

$$\|\hat{\theta}_s^n - \theta_s^*\| \leq 3\tilde{c}_0\sqrt{\max\{q, r\}(d+1)\tilde{\beta}^{-1}\tilde{\gamma}_n}.$$

The proof of this lemma mirrors that of Lemma 3.

Based on the above lemmas, we can now complete the proof of Theorem 2.

*Proof of Theorem 2.* From Lemma 6 and the condition  $n > 216\tilde{c}_0^2\tilde{\delta}^{-2}\tilde{\beta}^{-2}\sigma^2 \max\{q, r\}\|\theta_s^*\|_{2,0} \ln p$  we know that with probability at least  $1 - 4 \max\{q, r\} p^{-2}$ ,

$$\tilde{\gamma} = 3\tilde{c}_0\sqrt{\|\theta_s^*\|_{2,0}\tilde{\beta}^{-1}\tilde{\gamma}_n} \leq 6\tilde{c}_0\tilde{\beta}^{-1}\sigma\sqrt{6\|\theta_s^*\|_{2,0} \ln p/n} < \tilde{\delta}.$$

By applying Lemma 7 we obtain the desired result.  $\square$

## B Some Additional Remarks on Assumptions

We provide here a few additional remarks on the conditions under which Assumption 1 and Assumption 3 can be satisfied.

**Remark 4** (On Assumption 1: the basis  $\{\varphi_k(X_s), \phi_l(X_s, X_t)\}$  are bounded). *It can be verified that Assumption 1 holds when the basis  $\{\varphi_k(X_s), \phi_l(X_s, X_t)\}$  are bounded. Indeed, given the bounded basis,  $\{Z_{s,k}, Z_{st,l}\}$  are bounded random variables with zero means. Based on the Hoeffding's Lemma, for any random variable  $Z \in [a, b]$  and  $\mathbb{E}[Z] = 0$ , we have  $\mathbb{E}[\exp\{\eta Z\}] \leq \exp\{\eta^2(b-a)^2/8\}$  holds for all scalar  $\eta$ . Therefore Assumption 1 holds when the basis statistics  $\{\varphi_k(X_s), \phi_l(X_s, X_t)\}$  are bounded.*

**Remark 5** (On Assumption 1: the basis  $\{\varphi_k(X_s), \phi_l(X_s, X_t)\}$  are unbounded but sub-exponential). *We call a random variable  $Z$  sub-exponential if there exist constants  $c_1, c_2 > 0$  such that  $\mathbb{P}(|Z - \mathbb{E}(Z)| > \eta) \leq \exp\{c_1 - \eta/c_2\}$ , for all  $\eta > 0$ . Using the result in [23, Lemma 5.15], we can verify that Assumption 1 holds when  $\{\varphi_k(X_s), \phi_l(X_s, X_t)\}$  are sub-exponential random variables. For instance, consider that the energy function in (4) satisfies  $B(X; \theta^*) \leq -\frac{1}{2}(X - \mu)^\top \Omega (X - \mu) + c$  for some constant vector  $\mu$ , scalar  $c$  and positive-definite matrix  $\Omega \succ 0$ . It can be verified that the marginal distribution of  $X_s$  is bounded by  $\mathbb{P}(X_s) \leq c_s \exp\left\{-\frac{(X_s - \mu_s)^2}{2\sigma_s^2}\right\}$  for some constants  $c_s, \mu_s$  and  $\sigma_s$ . If further assuming there exist constants  $c_k > 0$  and  $c'_k$  such that  $\varphi_k(X_s) \leq c_k(X_s - \mu_s)^2 + c'_k$ , then we claim that  $Z_{s,k}$  is sub-exponential. Indeed, for any  $\eta > 0$ , by using Markov inequality we have*

$$\begin{aligned} \mathbb{P}(\varphi_k(X_s) > \eta) &\leq \frac{\mathbb{E}[\exp\{\varphi_k(X_s)/(4c_k\sigma_s^2)\}]}{\exp\{\eta/(4c_k\sigma_s^2)\}} \\ &\leq \frac{c_s \int_{\mathcal{X}} \exp\{-(X_s - \mu_s)^2/(4\sigma_s^2)\} dX_s}{\exp\{(\eta - c'_k)/(4c_k\sigma_s^2)\}} \\ &\propto \exp\{-(\eta - c'_k)/(4c_k\sigma_s^2)\}, \end{aligned}$$

which shows that  $\varphi_k(X_s)$  is a sub-exponential random variable and so is  $Z_{s,k}$ . Similarly, we can show that  $\phi_l(X_s, X_t)$  is sub-exponential if there exist  $c_l > 0$  and  $c'_l$  such that  $\phi_l(X_s, X_t) \leq c_l((X_s - \mu_s)^2 + (X_t - \mu_t)^2) + c'_l$ . Clearly, the analysis made for this example is applicable to the multivariate Gaussian for which some similar results have been established in [17, 16].

**Remark 6** (On Assumption 3). *Assumption 3 requires that the Hessian  $\nabla^2 \tilde{L}(\theta_s; \mathbb{X}_n)$  is positive definite in the cone  $\tilde{\mathcal{C}}_S$  when  $\theta_s$  lies in a local ball centered at  $\theta_s^*$ . Specially, when  $X$  is multivariate Gaussian, i.e.,  $\phi(X_s, X_t) = X_s X_t$  and  $f(X_s) = -X_s^2$ , this condition essentially requires that the design matrix  $A_s^n = \frac{1}{n} \sum_{i=1}^n X_{\setminus s}^{(i)} (X_{\setminus s}^{(i)})^\top$  is positive definite. In this case, if the precision matrix is positive definite, then it is known from the compressed sensing literature [3, 4] that with overwhelming probability,  $A_s^n$  is positive definite provided that the sample size  $n = O(\ln p)$  is sufficiently large. More generally, it can be verified that  $\mathbb{E}[\nabla^2 \tilde{L}(\theta_s; \mathbb{X}_n)]$  is the sub-matrix of  $\nabla^2 L(\theta; \mathbb{X}_n)$  associated with the pairs  $\{(s, t) \mid t \in V \setminus \{s\}\}$ . Therefore, if the whole Hessian matrix  $\nabla^2 L(\theta; \mathbb{X}_n)$  is positive definite at any  $\theta$ , then  $\mathbb{E}[\nabla^2 \tilde{L}(\theta_s; \mathbb{X}_n)]$  is also positive definite. By using weak law of large number we get that Assumption 3 holds with high probability when  $n$  is sufficiently large.*
